# Supplementary material
Source: publisher figshare collection journal article supplement (https://acs.figshare.com/ndownloader/files/4599562)
Supplement: Supplementary file 1 [file 4599562]

 
data_ptsis 
 
_audit_creation_method            SHELXL-97 
_chemical_name_systematic 
; 
 ? 
; 
_chemical_name_common             ? 
_chemical_melting_point           ? 
_chemical_formula_moiety          ? 
_chemical_formula_sum 
 'C24 H34 P2 Pt S2 Si' 
_chemical_formula_weight          671.75 
 
loop_ 
 _atom_type_symbol 
 _atom_type_description 
 _atom_type_scat_dispersion_real 
 _atom_type_scat_dispersion_imag 
 _atom_type_scat_source 
 'C'  'C'   0.0033   0.0016 
 'International Tables Vol C Tables 4.2.6.8 and 6.1.1.4' 
 'H'  'H'   0.0000   0.0000 
 'International Tables Vol C Tables 4.2.6.8 and 6.1.1.4' 
 'Si'  'Si'   0.0817   0.0704 
 'International Tables Vol C Tables 4.2.6.8 and 6.1.1.4' 
 'P'  'P'   0.1023   0.0942 
 'International Tables Vol C Tables 4.2.6.8 and 6.1.1.4' 
 'S'  'S'   0.1246   0.1234 
 'International Tables Vol C Tables 4.2.6.8 and 6.1.1.4' 
 'Pt'  'Pt'  -1.7033   8.3905 
 'International Tables Vol C Tables 4.2.6.8 and 6.1.1.4' 
 
_symmetry_cell_setting           'Orthorhombic'
_symmetry_space_group_name_H-M   'Pnma '
 
loop_ 
 _symmetry_equiv_pos_as_xyz 
 'x, y, z' 
 '-x+1/2, -y, z+1/2' 
 '-x, y+1/2, -z' 
 'x+1/2, -y+1/2, -z+1/2' 
 '-x, -y, -z' 
 'x-1/2, y, -z-1/2' 
 'x, -y-1/2, z' 
 '-x-1/2, y-1/2, z-1/2' 
 
_cell_length_a                    17.707(2) 
_cell_length_b                    13.5049(19) 
_cell_length_c                    11.8162(12) 
_cell_angle_alpha                 90.00 
_cell_angle_beta                  90.00 
_cell_angle_gamma                 90.00 
_cell_volume                      2825.7(6) 
_cell_formula_units_Z             4 
_cell_measurement_temperature     293(2) 
_cell_measurement_reflns_used      42
_cell_measurement_theta_min        2.30
_cell_measurement_theta_max       24.89
 
_exptl_crystal_description       'CUBE             '
_exptl_crystal_colour            'COLORLESS         '
_exptl_crystal_size_max          0.48
_exptl_crystal_size_mid          0.46
_exptl_crystal_size_min          0.44
_exptl_crystal_density_meas       ? 
_exptl_crystal_density_diffrn     1.579 
_exptl_crystal_density_method     'not measured' 
_exptl_crystal_F_000              1328 
_exptl_absorpt_coefficient_mu     5.279 
_exptl_absorpt_correction_type   'empirical'
_exptl_absorpt_correction_T_min  0.2308
_exptl_absorpt_correction_T_max  0.3790
_exptl_absorpt_process_details    ? 
 
_exptl_special_details 
; 
 ? 
; 
 
_diffrn_ambient_temperature       293(2) 
_diffrn_radiation_wavelength      0.71073 
_diffrn_radiation_type           'MoK\a'
_diffrn_radiation_source         'sealed tube'
_diffrn_radiation_monochromator  'graphite'
_diffrn_measurement_device       'Siemens P4'
_diffrn_measurement_method       '\w scans'
_diffrn_detector_area_resol_mean  ? 
_diffrn_standards_number            3
_diffrn_standards_interval_count   97
_diffrn_standards_interval_time   ? 
_diffrn_standards_decay_%         ? 
_diffrn_reflns_number             2580 
_diffrn_reflns_av_R_equivalents   0.0000 
_diffrn_reflns_av_sigmaI/netI     0.0259 
_diffrn_reflns_limit_h_min        0 
_diffrn_reflns_limit_h_max        21 
_diffrn_reflns_limit_k_min        -16 
_diffrn_reflns_limit_k_max        0 
_diffrn_reflns_limit_l_min        -14 
_diffrn_reflns_limit_l_max        0 
_diffrn_reflns_theta_min          2.07 
_diffrn_reflns_theta_max          25.00 
_reflns_number_total              2580 
_reflns_number_gt                 2365 
_reflns_threshold_expression      >2sigma(I) 
 
_computing_data_collection      'Siemens XSCANS'
_computing_cell_refinement      'Siemens XSCANS'
_computing_data_reduction       'Siemens SHELXTL'
_computing_structure_solution     'SHELXS-97 (Sheldrick, 1990)' 
_computing_structure_refinement   'SHELXL-97 (Sheldrick, 1997)' 
_computing_molecular_graphics   'Siemens SHELXTL'
_computing_publication_material 'Siemens SHELXTL'
 
_refine_special_details 
; 
 Refinement of F^2^ against ALL reflections.  The weighted R-factor wR and 
 goodness of fit S are based on F^2^, conventional R-factors R are based 
 on F, with F set to zero for negative F^2^. The threshold expression of 
 F^2^ > 2sigma(F^2^) is used only for calculating R-factors(gt) etc. and is 
 not relevant to the choice of reflections for refinement.  R-factors based 
 on F^2^ are statistically about twice as large as those based on F, and R- 
 factors based on ALL data will be even larger. 
; 
 
_refine_ls_structure_factor_coef  Fsqd  
_refine_ls_matrix_type            full 
_refine_ls_weighting_scheme       calc  
_refine_ls_weighting_details 
 'calc w=1/[\s^2^(Fo^2^)+(0.0476P)^2^+1.5458P] where P=(Fo^2^+2Fc^2^)/3' 
_atom_sites_solution_primary      direct 
_atom_sites_solution_secondary    difmap 
_atom_sites_solution_hydrogens    geom 
_refine_ls_hydrogen_treatment     mixed 
_refine_ls_extinction_method      SHELXL 
_refine_ls_extinction_coef        0.00097(12) 
_refine_ls_extinction_expression 
 'Fc^*^=kFc[1+0.001xFc^2^\l^3^/sin(2\q)]^-1/4^' 
_refine_ls_number_reflns          2580 
_refine_ls_number_parameters      152 
_refine_ls_number_restraints      0 
_refine_ls_R_factor_all           0.0325 
_refine_ls_R_factor_gt            0.0292 
_refine_ls_wR_factor_ref          0.0762 
_refine_ls_wR_factor_gt           0.0740 
_refine_ls_goodness_of_fit_ref    1.066 
_refine_ls_restrained_S_all       1.066 
_refine_ls_shift/su_max           0.001 
_refine_ls_shift/su_mean          0.000 
 
loop_ 
 _atom_site_label 
 _atom_site_type_symbol 
 _atom_site_fract_x 
 _atom_site_fract_y 
 _atom_site_fract_z 
 _atom_site_U_iso_or_equiv 
 _atom_site_adp_type 
 _atom_site_occupancy 
 _atom_site_symmetry_multiplicity 
 _atom_site_calc_flag 
 _atom_site_refinement_flags 
 _atom_site_disorder_assembly 
 _atom_site_disorder_group 
Pt1 Pt 0.355623(11) 0.2500 0.963619(15) 0.03152(11) Uani 1 2 d S . . 
S1 S 0.35783(7) 0.13038(9) 1.11290(9) 0.0504(3) Uani 1 1 d . . . 
P1 P 0.35422(5) 0.11715(8) 0.84606(9) 0.0360(2) Uani 1 1 d . . . 
Si1 Si 0.34811(9) 0.2500 1.22541(13) 0.0373(4) Uani 1 2 d S . . 
C1 C 0.4376(3) 0.0405(3) 0.8667(4) 0.0566(12) Uani 1 1 d . . . 
H1A H 0.4408 0.0217 0.9458 0.068 Uiso 1 1 calc R . . 
H1B H 0.4323 -0.0195 0.8224 0.068 Uiso 1 1 calc R . . 
C2 C 0.5109(3) 0.0931(5) 0.8326(6) 0.0810(17) Uani 1 1 d . . . 
C3 C 0.2747(3) 0.0364(4) 0.8756(4) 0.0564(12) Uani 1 1 d . . . 
H3A H 0.2786 -0.0225 0.8289 0.068 Uiso 1 1 calc R . . 
H3B H 0.2767 0.0158 0.9542 0.068 Uiso 1 1 calc R . . 
C4 C 0.2003(3) 0.0859(5) 0.8532(6) 0.0849(19) Uani 1 1 d . . . 
H4A H 0.1600 0.0407 0.8698 0.127 Uiso 1 1 calc R . . 
H4B H 0.1977 0.1052 0.7751 0.127 Uiso 1 1 calc R . . 
H4C H 0.1957 0.1435 0.9003 0.127 Uiso 1 1 calc R . . 
C5 C 0.3495(2) 0.1296(4) 0.6930(3) 0.0496(11) Uani 1 1 d . . . 
H5A H 0.3044 0.1668 0.6741 0.060 Uiso 1 1 calc R . . 
H5B H 0.3926 0.1682 0.6681 0.060 Uiso 1 1 calc R . . 
C6 C 0.3484(4) 0.0331(5) 0.6267(5) 0.0815(19) Uani 1 1 d . . . 
H6A H 0.3457 0.0473 0.5472 0.122 Uiso 1 1 calc R . . 
H6B H 0.3052 -0.0053 0.6487 0.122 Uiso 1 1 calc R . . 
H6C H 0.3936 -0.0037 0.6424 0.122 Uiso 1 1 calc R . . 
C7 C 0.4229(3) 0.2500 1.3390(5) 0.0402(13) Uani 1 2 d S . . 
C8 C 0.4509(2) 0.1620(4) 1.3832(4) 0.0514(11) Uani 1 1 d . . . 
H8 H 0.4339 0.1020 1.3542 0.062 Uiso 1 1 calc R . . 
C9 C 0.5042(3) 0.1622(5) 1.4707(4) 0.0621(14) Uani 1 1 d . . . 
H9 H 0.5223 0.1026 1.4992 0.075 Uiso 1 1 calc R . . 
C10 C 0.5297(4) 0.2500 1.5144(6) 0.062(2) Uani 1 2 d S . . 
H10 H 0.5643 0.2500 1.5737 0.075 Uiso 1 2 calc SR . . 
C11 C 0.2554(3) 0.2500 1.3013(5) 0.0385(12) Uani 1 2 d S . . 
C12 C 0.1884(4) 0.2500 1.2403(6) 0.0544(16) Uani 1 2 d S . . 
H12 H 0.1907 0.2500 1.1617 0.065 Uiso 1 2 calc SR . . 
C13 C 0.1190(4) 0.2500 1.2921(8) 0.066(2) Uani 1 2 d S . . 
H13 H 0.0751 0.2500 1.2487 0.080 Uiso 1 2 calc SR . . 
C14 C 0.1147(5) 0.2500 1.4069(8) 0.072(2) Uani 1 2 d S . . 
H14 H 0.0677 0.2500 1.4420 0.086 Uiso 1 2 calc SR . . 
C15 C 0.1778(6) 0.2500 1.4699(6) 0.076(3) Uani 1 2 d S . . 
H15 H 0.1745 0.2500 1.5485 0.092 Uiso 1 2 calc SR . . 
C16 C 0.2476(4) 0.2500 1.4178(5) 0.0522(16) Uani 1 2 d S . . 
H16 H 0.2909 0.2500 1.4625 0.063 Uiso 1 2 calc SR . . 
 
loop_ 
 _atom_site_aniso_label 
 _atom_site_aniso_U_11 
 _atom_site_aniso_U_22 
 _atom_site_aniso_U_33 
 _atom_site_aniso_U_23 
 _atom_site_aniso_U_13 
 _atom_site_aniso_U_12 
Pt1 0.03827(16) 0.03137(16) 0.02492(15) 0.000 0.00029(8) 0.000 
S1 0.0860(9) 0.0354(6) 0.0299(5) 0.0017(4) 0.0001(5) 0.0062(5) 
P1 0.0442(6) 0.0345(5) 0.0295(5) -0.0032(4) 0.0014(4) -0.0006(4) 
Si1 0.0456(8) 0.0392(9) 0.0272(8) 0.000 -0.0009(6) 0.000 
C1 0.075(3) 0.043(2) 0.052(3) -0.002(2) 0.000(2) 0.020(2) 
C2 0.051(3) 0.088(4) 0.104(4) 0.006(4) 0.007(3) 0.021(3) 
C3 0.072(3) 0.049(3) 0.048(2) -0.002(2) 0.012(2) -0.022(2) 
C4 0.054(3) 0.113(5) 0.088(4) 0.011(4) -0.001(3) -0.031(3) 
C5 0.064(3) 0.054(3) 0.031(2) -0.004(2) 0.0010(17) -0.007(2) 
C6 0.124(5) 0.078(4) 0.043(3) -0.019(3) 0.005(3) -0.027(4) 
C7 0.035(3) 0.052(3) 0.033(3) 0.000 0.005(2) 0.000 
C8 0.050(2) 0.056(3) 0.049(2) 0.004(2) -0.0064(19) -0.005(2) 
C9 0.058(3) 0.071(4) 0.057(3) 0.015(3) -0.009(2) 0.009(3) 
C10 0.045(4) 0.099(6) 0.043(4) 0.000 -0.011(3) 0.000 
C11 0.041(3) 0.034(3) 0.040(3) 0.000 -0.004(2) 0.000 
C12 0.047(3) 0.064(4) 0.052(4) 0.000 -0.009(3) 0.000 
C13 0.043(3) 0.075(5) 0.081(5) 0.000 -0.010(4) 0.000 
C14 0.055(4) 0.072(5) 0.088(6) 0.000 0.017(4) 0.000 
C15 0.069(5) 0.109(8) 0.051(5) 0.000 0.008(4) 0.000 
C16 0.043(3) 0.075(5) 0.039(3) 0.000 0.001(3) 0.000 
 
_geom_special_details 
; 
 All esds (except the esd in the dihedral angle between two l.s. planes) 
 are estimated using the full covariance matrix.  The cell esds are taken 
 into account individually in the estimation of esds in distances, angles 
 and torsion angles; correlations between esds in cell parameters are only 
 used when they are defined by crystal symmetry.  An approximate (isotropic) 
 treatment of cell esds is used for estimating esds involving l.s. planes. 
; 
 
loop_ 
 _geom_bond_atom_site_label_1 
 _geom_bond_atom_site_label_2 
 _geom_bond_distance 
 _geom_bond_site_symmetry_2 
 _geom_bond_publ_flag 
Pt1 P1 2.2691(11) . ? 
Pt1 P1 2.2691(11) 7_565 ? 
Pt1 S1 2.3922(12) 7_565 ? 
Pt1 S1 2.3922(12) . ? 
S1 Si1 2.0992(16) . ? 
P1 C3 1.815(4) . ? 
P1 C5 1.818(4) . ? 
P1 C1 1.819(5) . ? 
Si1 C11 1.871(6) . ? 
Si1 C7 1.886(6) . ? 
Si1 S1 2.0992(16) 7_565 ? 
C1 C2 1.534(8) . ? 
C3 C4 1.500(8) . ? 
C5 C6 1.521(7) . ? 
C7 C8 1.389(5) . ? 
C7 C8 1.389(5) 7_565 ? 
C8 C9 1.400(6) . ? 
C9 C10 1.370(7) . ? 
C10 C9 1.370(7) 7_565 ? 
C11 C16 1.384(8) . ? 
C11 C12 1.387(8) . ? 
C12 C13 1.373(10) . ? 
C13 C14 1.358(12) . ? 
C14 C15 1.343(13) . ? 
C15 C16 1.381(11) . ? 
 
loop_ 
 _geom_angle_atom_site_label_1 
 _geom_angle_atom_site_label_2 
 _geom_angle_atom_site_label_3 
 _geom_angle 
 _geom_angle_site_symmetry_1 
 _geom_angle_site_symmetry_3 
 _geom_angle_publ_flag 
P1 Pt1 P1 104.49(6) . 7_565 ? 
P1 Pt1 S1 170.23(4) . 7_565 ? 
P1 Pt1 S1 85.27(4) 7_565 7_565 ? 
P1 Pt1 S1 85.27(4) . . ? 
P1 Pt1 S1 170.23(4) 7_565 . ? 
S1 Pt1 S1 84.96(6) 7_565 . ? 
Si1 S1 Pt1 86.90(5) . . ? 
C3 P1 C5 102.2(2) . . ? 
C3 P1 C1 105.2(3) . . ? 
C5 P1 C1 102.9(2) . . ? 
C3 P1 Pt1 111.48(16) . . ? 
C5 P1 Pt1 122.44(18) . . ? 
C1 P1 Pt1 111.02(16) . . ? 
C11 Si1 C7 106.0(2) . . ? 
C11 Si1 S1 112.05(11) . . ? 
C7 Si1 S1 113.15(11) . . ? 
C11 Si1 S1 112.05(11) . 7_565 ? 
C7 Si1 S1 113.15(11) . 7_565 ? 
S1 Si1 S1 100.63(9) . 7_565 ? 
C2 C1 P1 112.8(3) . . ? 
C4 C3 P1 112.3(4) . . ? 
C6 C5 P1 115.7(4) . . ? 
C8 C7 C8 117.6(5) . 7_565 ? 
C8 C7 Si1 121.2(3) . . ? 
C8 C7 Si1 121.2(3) 7_565 . ? 
C7 C8 C9 121.1(5) . . ? 
C10 C9 C8 120.2(5) . . ? 
C9 C10 C9 119.9(6) . 7_565 ? 
C16 C11 C12 115.6(6) . . ? 
C16 C11 Si1 124.3(4) . . ? 
C12 C11 Si1 120.1(4) . . ? 
C13 C12 C11 122.3(7) . . ? 
C14 C13 C12 119.6(8) . . ? 
C15 C14 C13 120.5(8) . . ? 
C14 C15 C16 119.8(7) . . ? 
C15 C16 C11 122.2(6) . . ? 
 
_diffrn_measured_fraction_theta_max    0.991 
_diffrn_reflns_theta_full              25.00 
_diffrn_measured_fraction_theta_full   0.991 
_refine_diff_density_max    0.797 
_refine_diff_density_min   -0.622 
_refine_diff_density_rms    0.112 
